# Supplementary material
Source: PubMed Central journal article supplement (PMC539163)
Supplement: mbc_E04-08-0758_1.pdf [file mbc_E04-08-0758_1.pdf]

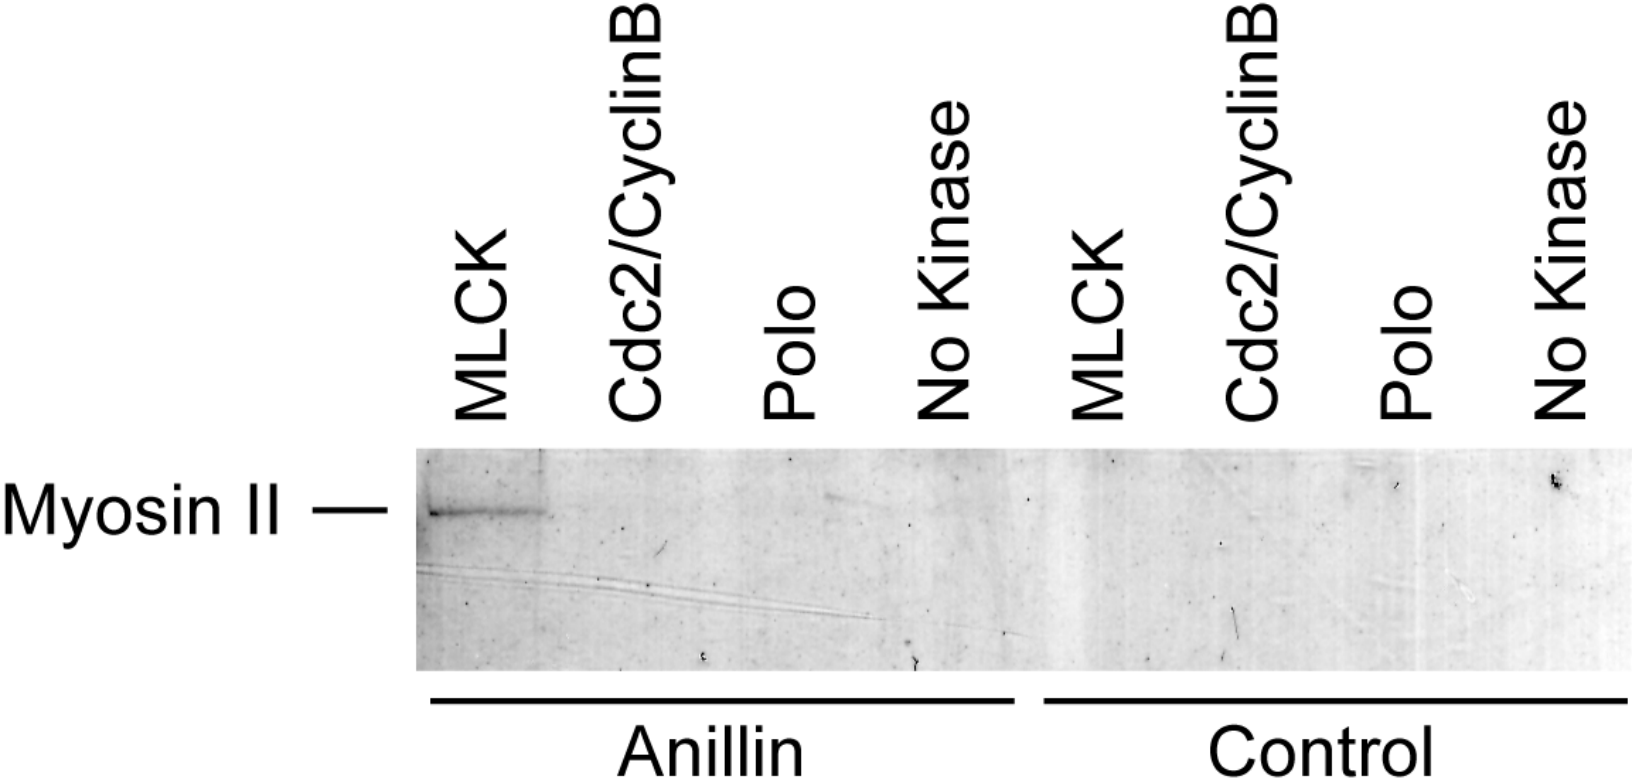

**Figure S1**

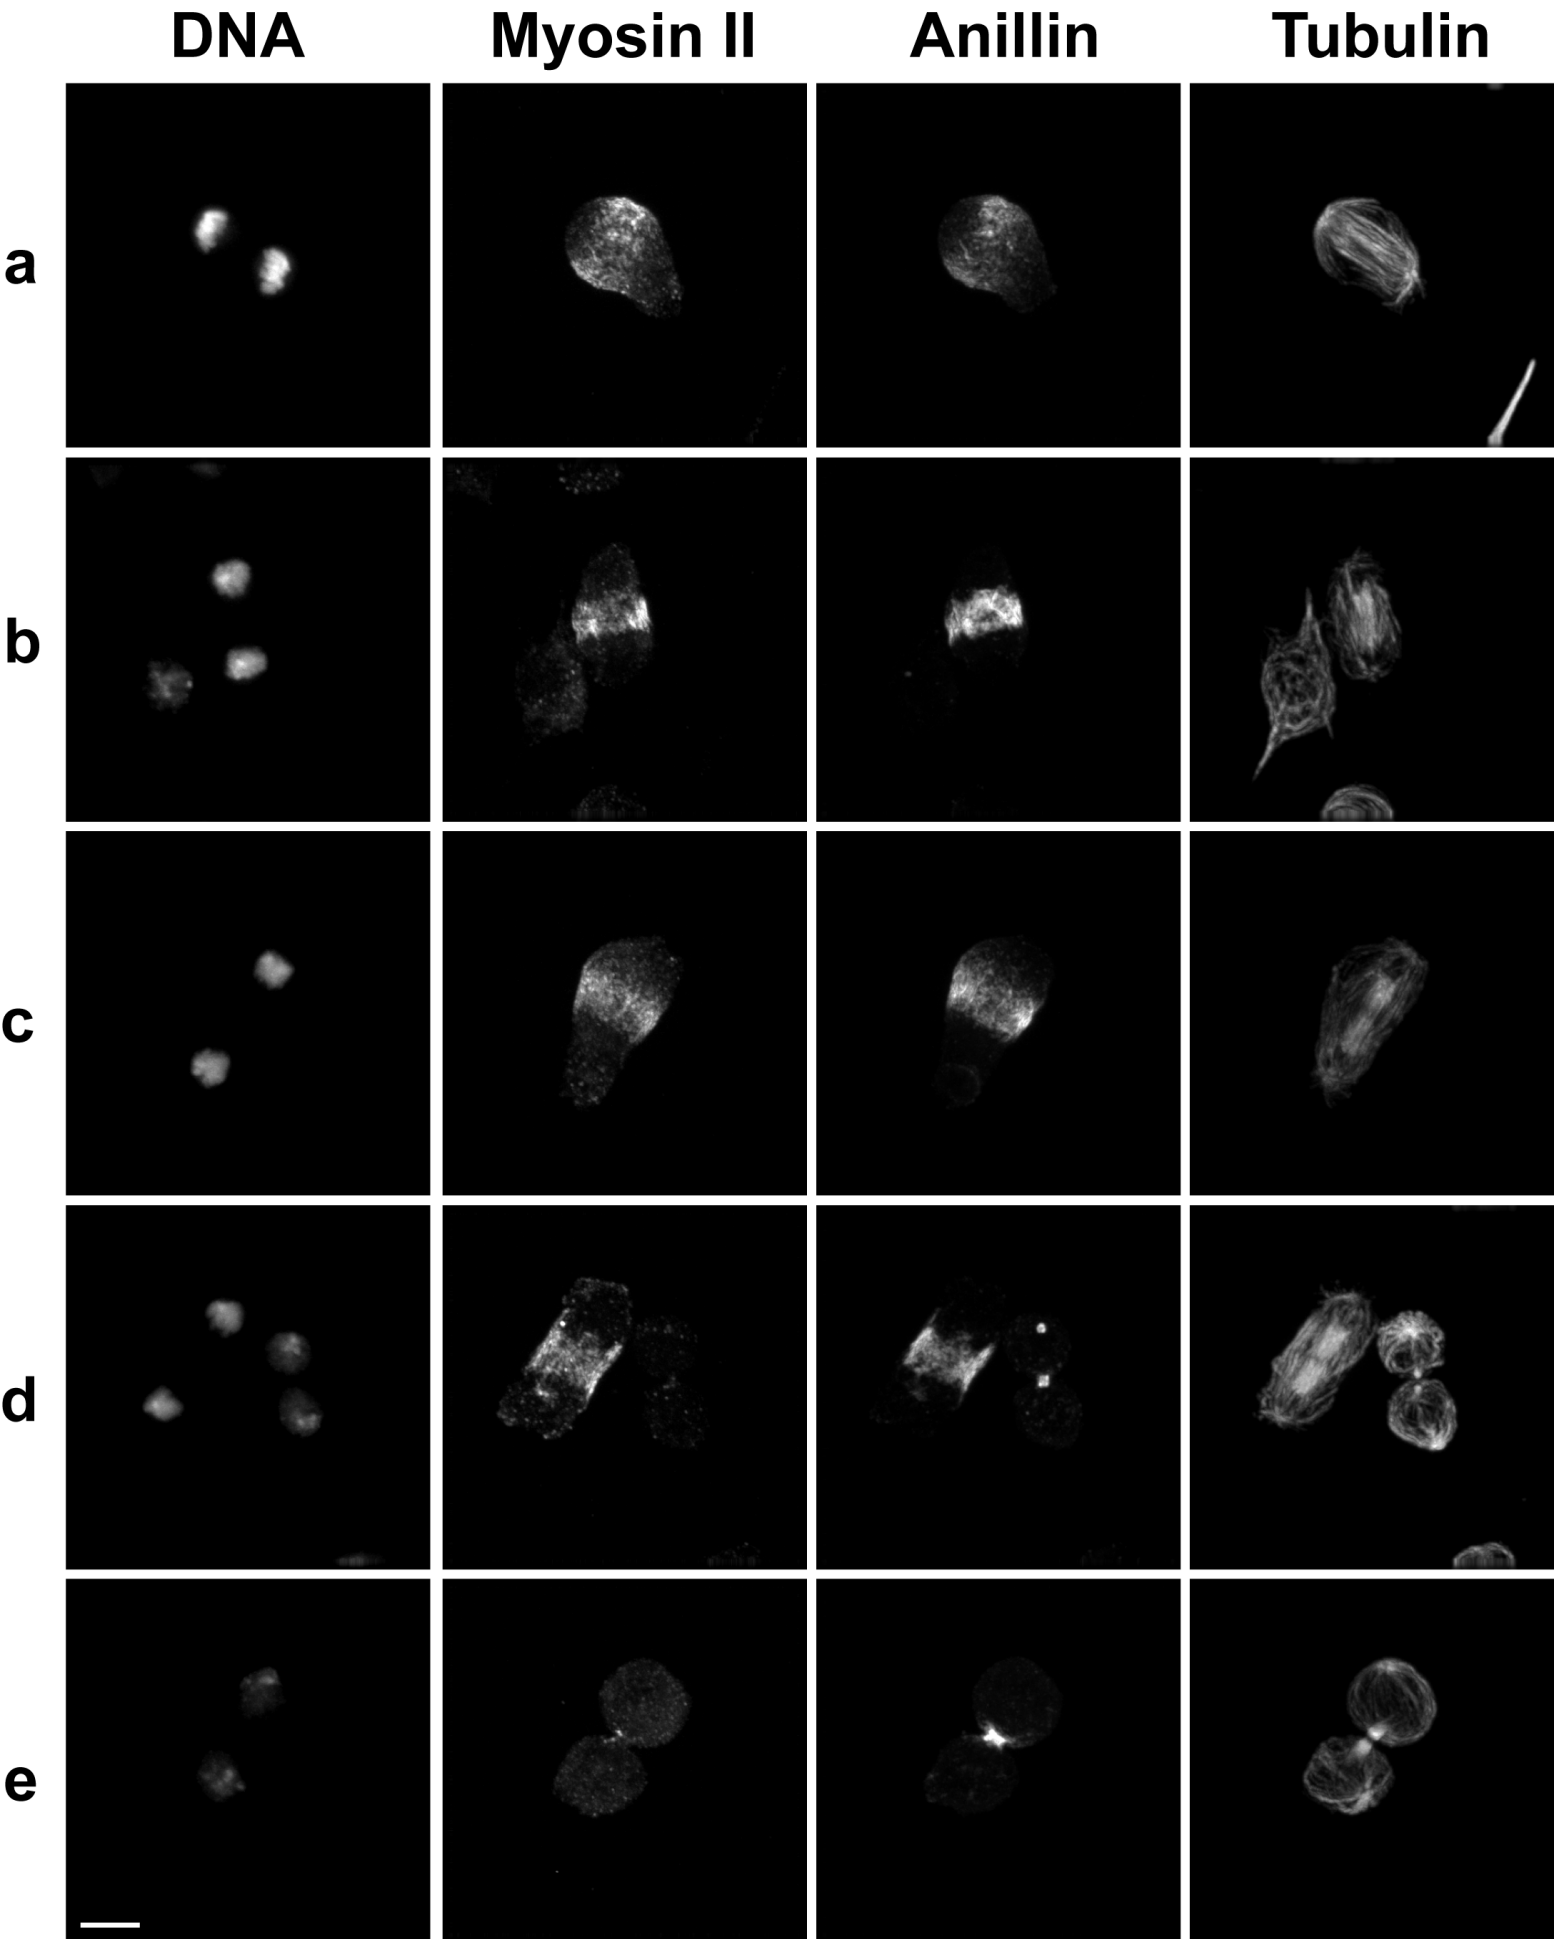

Figure S2

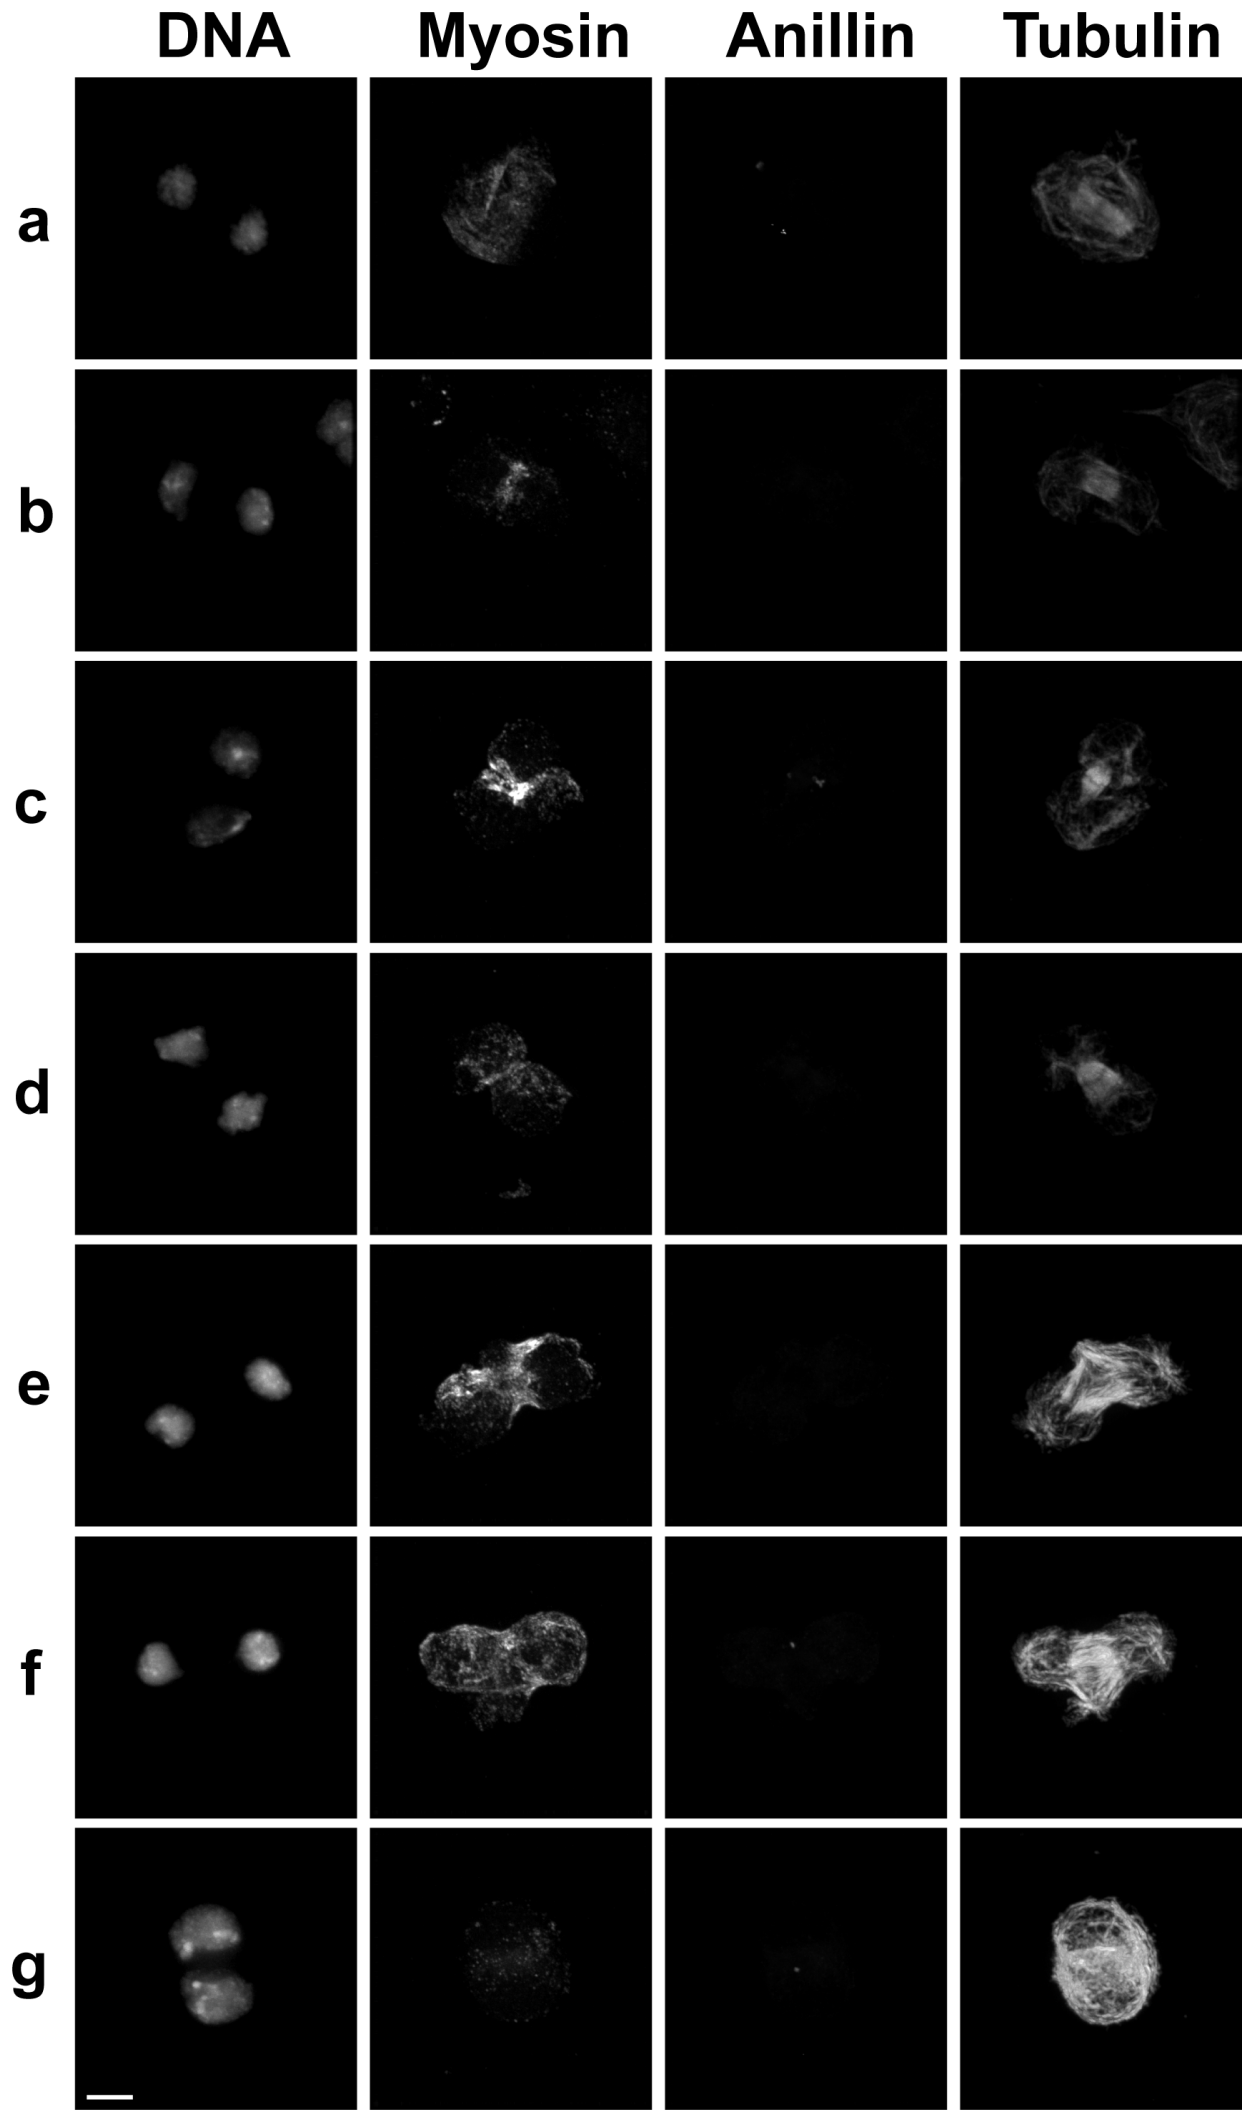

Figure S3

**Figure S1** – Myosin binding to Anillin and control GST beads. Coomassie staining of eluates from anillin or GST columns after phosphorylation as described in Figure 4.

**Figure S2** – *Drosophila* Kc167 cells fixed and stained for DNA, myosin II, anillin and tubulin during different stages of cytokinesis. Scale bar represents 5  $\mu\text{m}$ .

**Figure S3** – *Drosophila* Kc167 cells treated with dsRNA for anillin then fixed and stained for DNA, myosin II, anillin and tubulin during different stages of cytokinesis. Scale bar represents 5  $\mu\text{m}$ .
